# Supplementary material for: Efficacy of 5 and 10 mg donepezil in improving cognitive function in patients with dementia: a systematic review and meta-analysis
Source: Frontiers journal article supplement (doi:10.3389/fnins.2024.1398952), 2024-07-22
Supplement: Data_Sheet_1.PDF [file Data_Sheet_1.PDF]

# Supplementary File

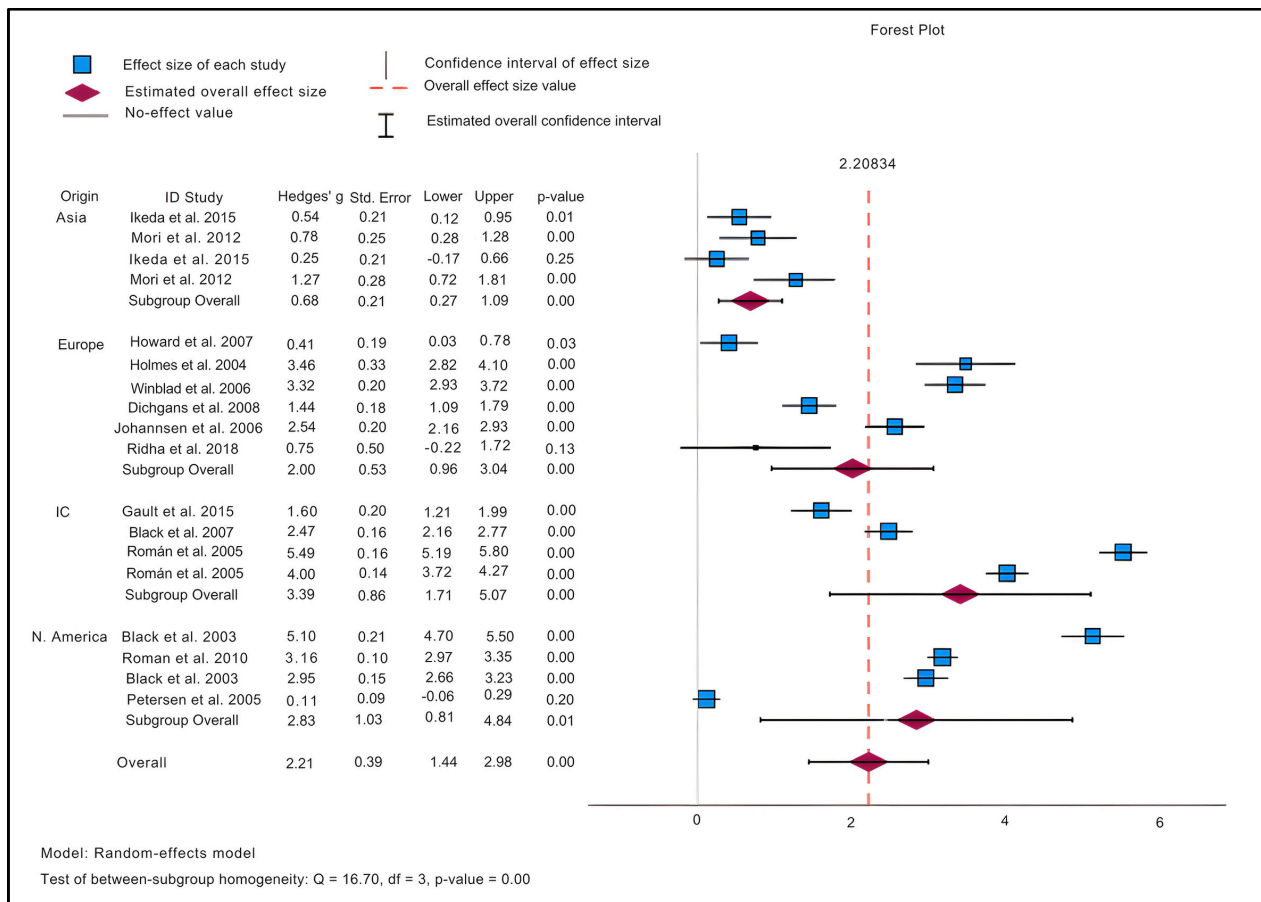

**Figure S1** Forest plot of MMSE subgroup: Region

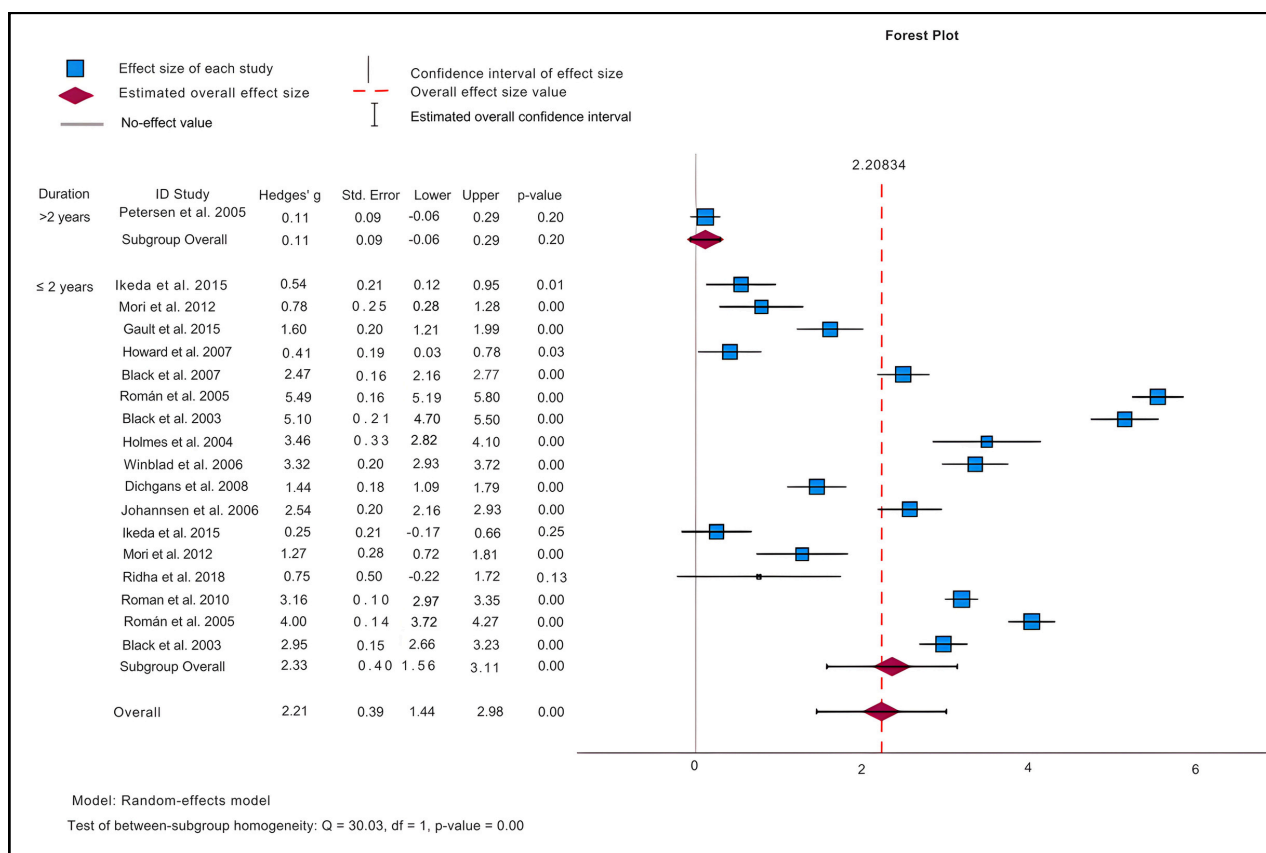

**Figure S2** Forest plot of MMSE subgroup: Duration

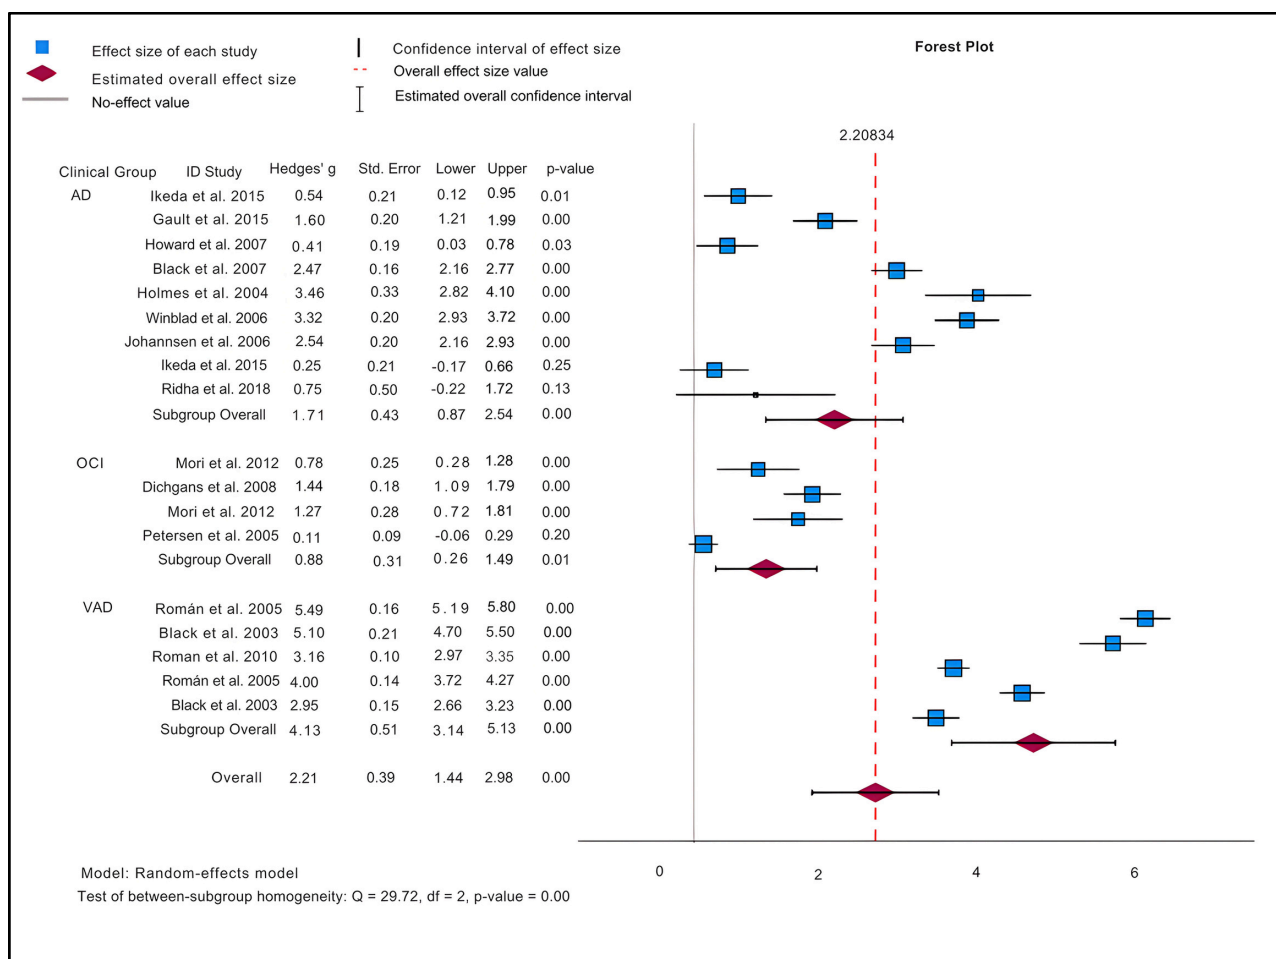

**Figure S3** Forest plot of MMSE subgroup: Clinical group

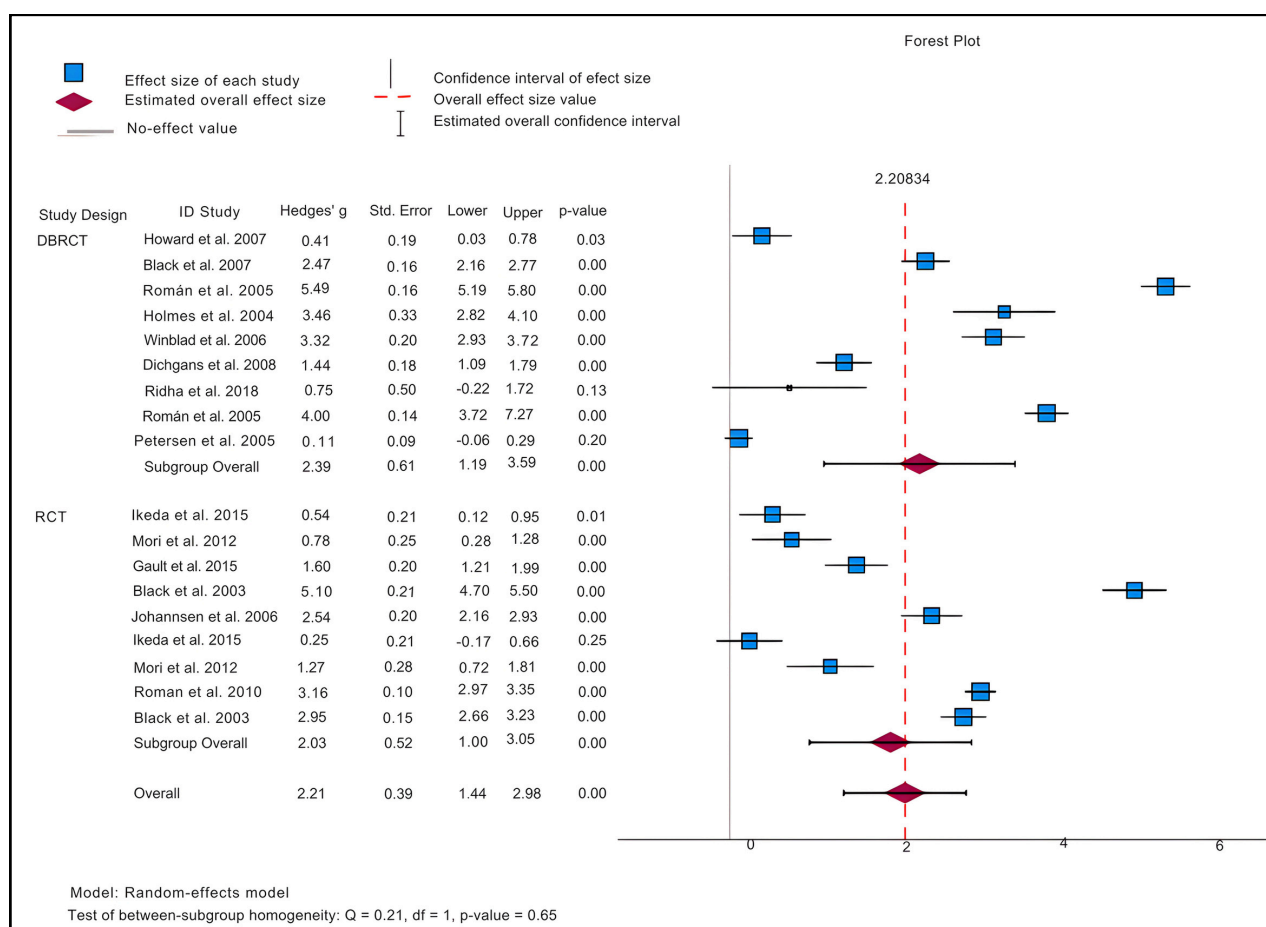

**Figure S4** Forest plot of MMSE subgroup: Study design

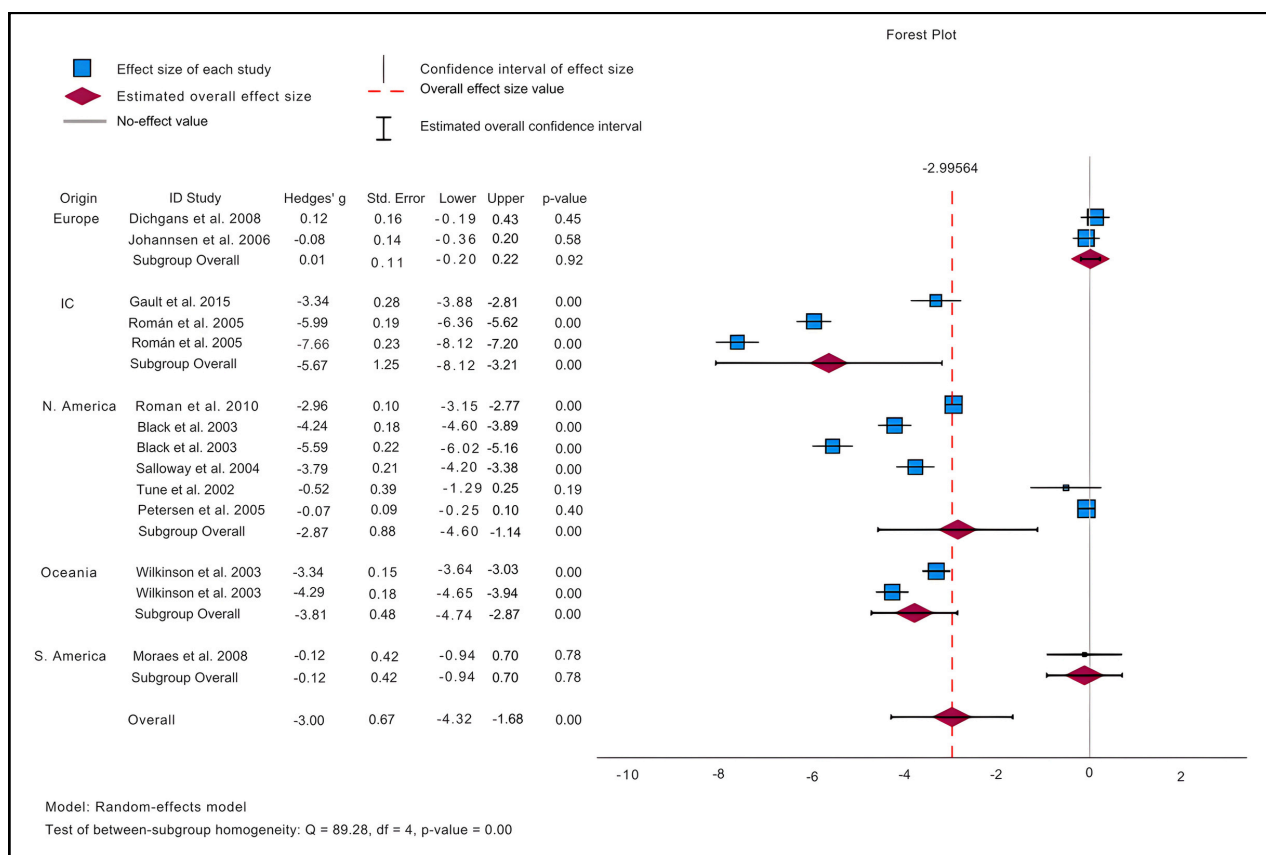

**Figure S5** Forest plot of ADAS-cog subgroup: Region

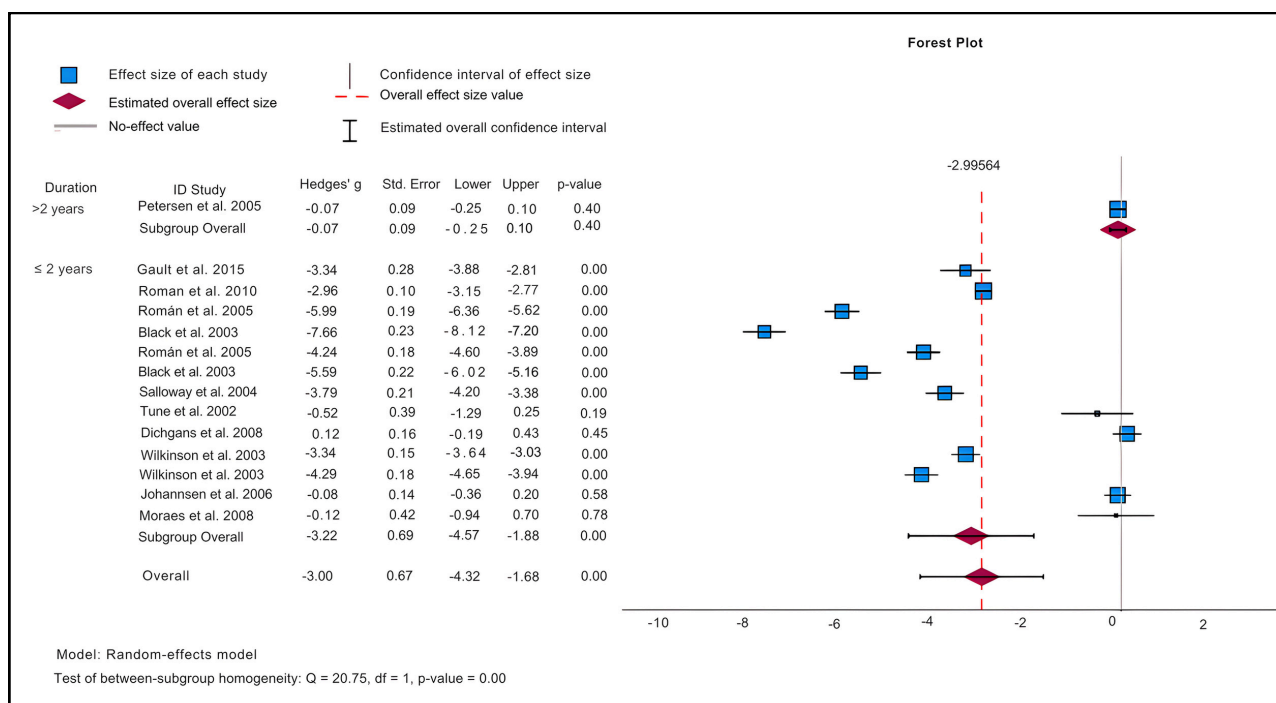

**Figure S6** Forest plot of ADAS-cog subgroup: Duration

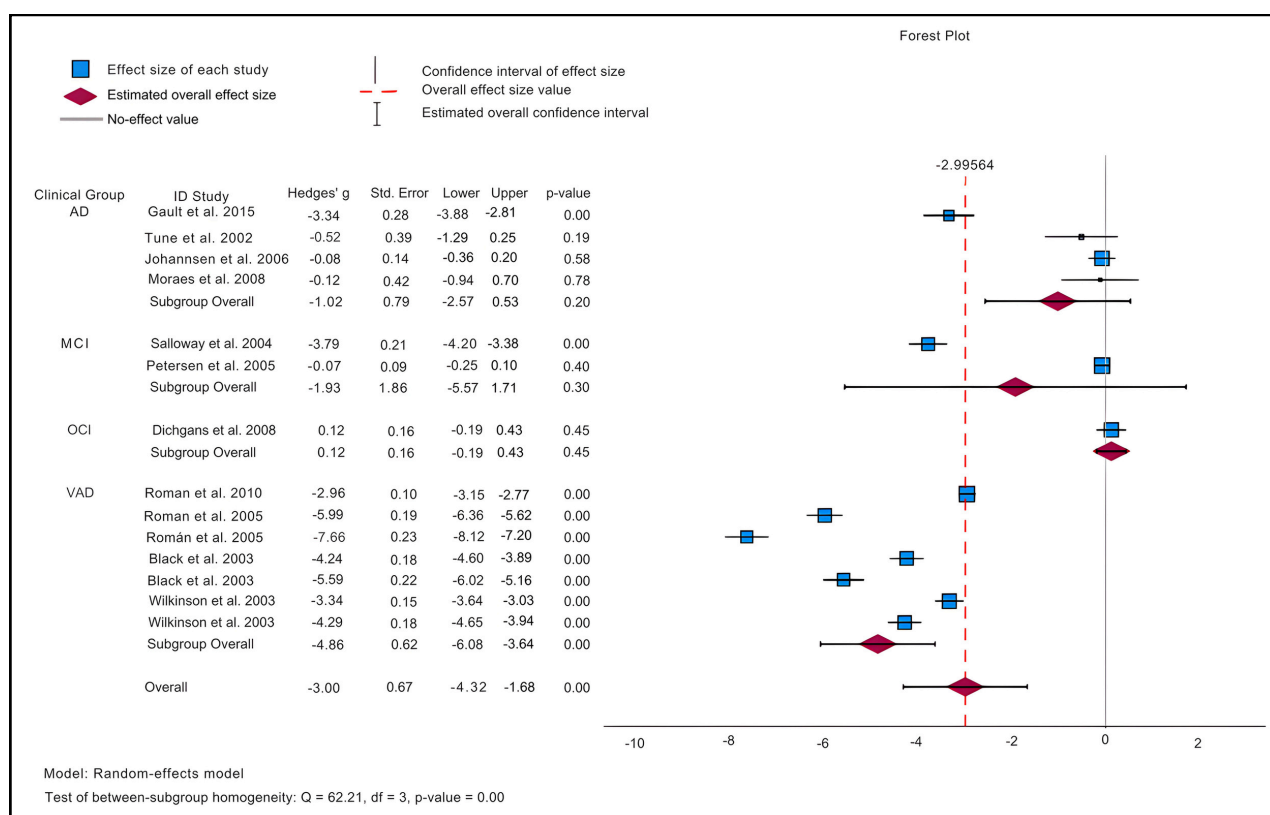

**Figure S7** Forest plot of ADAS-cog subgroup: Clinical group

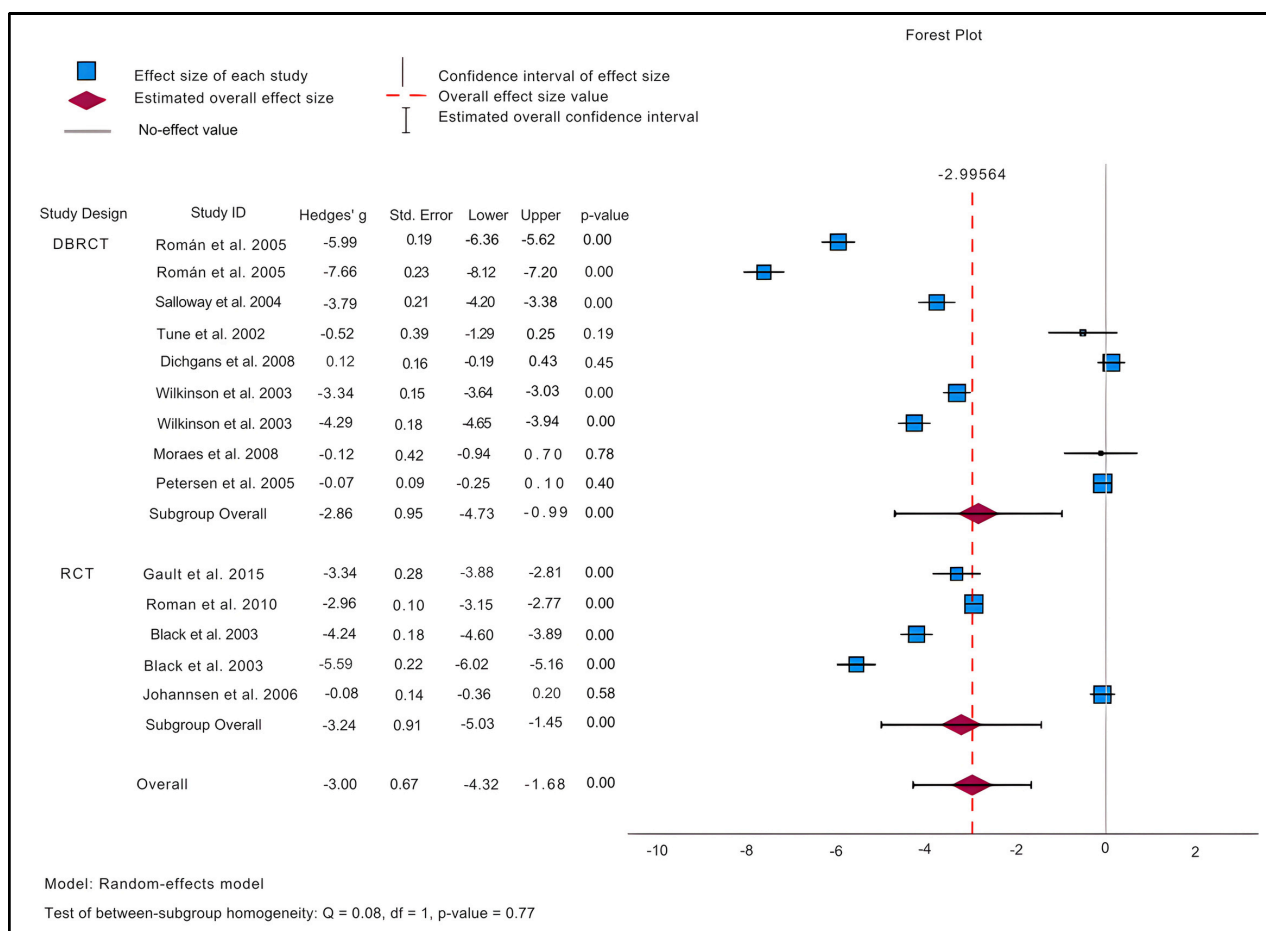

**Figure S8** Forest plot of ADAS-cog subgroup: Study design
